# Supplementary material
Source: Springer Nature journal article supplement (https://www.springermedizin.de/resource/supplementary/12993_2007_142_MOESM2_ESM.pdf/9617294)

# ADHD subject

Control Period: -0.2 sec to 0.0 sec

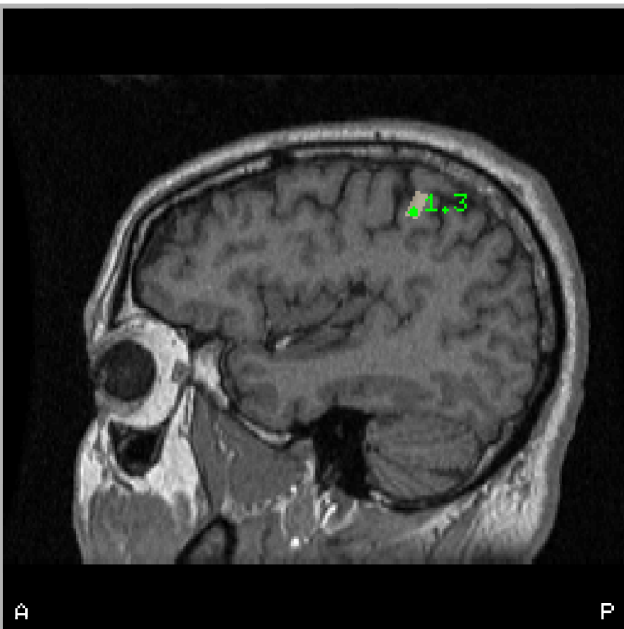

Slice: 89 of 256  
(Sagittal)

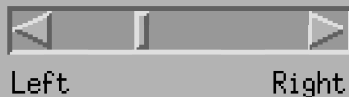

Active Period: 0.0 sec to 0.2 sec

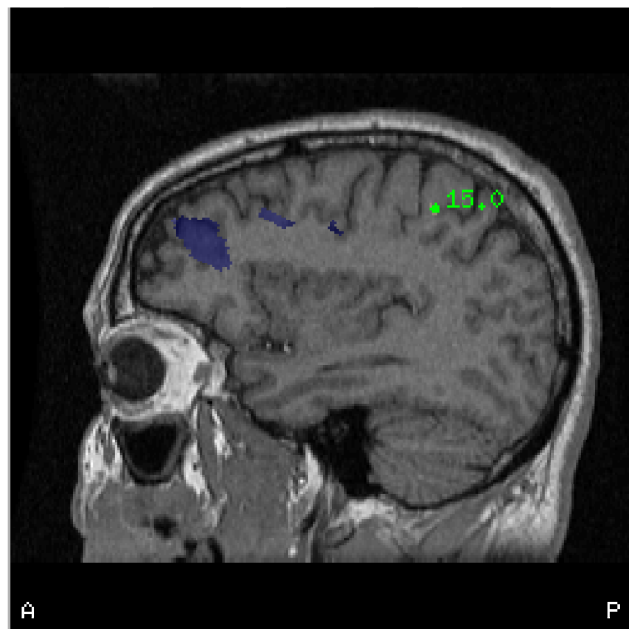

Slice: 95 of 256  
(Sagittal)

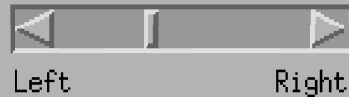

Supplement: MOESM2 [file 9617294]
